# Supplementary material for: Methyl-rotation dynamics in metal–organic frameworks probed with terahertz spectroscopy
Source: Royal Society of Chemistry journal article supplement (doi:10.1039/c8cc02650e), 2018-01-01
Supplement: c8cc02650e1.pdf [file c8cc02650e1.pdf]

## Supporting Information for: Methyl-Rotation Dynamics in Metal-Organic Frameworks Probed with Terahertz Spectroscopy

Qi Li<sup>1</sup>, Adam J. Zaczek<sup>2</sup>, Timothy M. Korter<sup>2</sup>, J. Axel Zeitler<sup>1</sup>, Michael T. Ruggiero<sup>1,3,\*</sup>

<sup>1</sup>*Department of Chemical Engineering and Biotechnology, University of Cambridge, Philippa Fawcett Drive, Cambridge, CB3 0AS, United Kingdom*

<sup>2</sup>*Department of Chemistry, Syracuse University, 1-014 Center for Science and Technology, Syracuse, NY 13244, United States of America*

<sup>3</sup>*Department of Chemistry, University of Vermont, 82 University Place, Burlington, VT 05405, United States of America*

\**mtr34@cam.ac.uk*

### 1. Methods

#### *DFT Simulations*

DFT calculations were performed using the CRYSTAL17 software package.<sup>(1)</sup> The M06-2X meta-global gradient approximation (meta-GGA) density functional was used for correlation and exchange (with 54% explicit Hartree-Fock exchange),<sup>(2)</sup> and the split-valence double-zeta 6-31G(d,p) basis set<sup>(3)</sup> was utilized for all calculations, based on previous success with this model.<sup>(4)</sup> The published crystallographic data<sup>(5)</sup> were used to initialize geometry optimizations, which had an energy convergence criterion of  $\Delta E < 10^{-8}$  hartree. For the geometry optimizations, all parameters were allowed to fully relax (atomic positions and lattice vectors) with no constraints other than the space group symmetry of the solid. Due to the electronic structure of cobalt, spin-unrestricted calculations were performed for ZIF-67 and three electrons were initially set as unpaired in a ferromagnetic arrangement for the first five self-consistent field cycles, after which the constraint was removed. Vibrational analyses were calculated based on the optimized geometry, and the IR intensities were calculated using the Berry phase method.<sup>(6-8)</sup> A more accurate two-point numerical differentiation (program keyword NUMDERIV = 2) was used to improve the accuracy of the predicted vibrational frequencies. The energy convergence was more rigorous for the vibrational simulations, and was set to of  $\Delta E < 10^{-10}$  hartree.

#### *Experimental Spectroscopy*

The experimental THz-TDS measurements were performed using a commercial Toptica TeraFlash spectrometer (Munich, Germany), and samples were prepared by mixing the samples with polytetrafluoroethylene ( ~4.5% w/w concentration) and pressing into 13.0 mm diameter pellets with a thickness of 2.0 mm. The low-frequency Raman measurements were performed using an Ondax (Monrovia, California, United States) THz-Raman system with a 784.7 nm centered laser excitation fiber coupled to an Andor (Belfast, United Kingdom) Shamrock 750 nm spectrograph

equipped with an Andor iDus 416 CCD. The respective pure ZIF sample was ground and placed into a 1.0 cm diameter glass capillary, with an empty capillary used for background determination.

## References

1. Dovesi R, Erba A, Orlando R, Zicovich-Wilson CM, Civalleri B, Maschio L, et al. Quantum-mechanical condensed matter simulations with CRYSTAL. *WIREs Comput Mol Sci*. 2018;110(39): 1360.
2. Zhao Y, Truhlar DG. The M06 suite of density functionals for main group thermochemistry, thermochemical kinetics, noncovalent interactions, excited states, and transition elements: two new functionals and systematic testing of four M06-class functionals and 12 other functionals. *Theor Chem Acc*. 2nd ed. Springer-Verlag; 2007 Jul 12;120(1-3):215–41.
3. Krishnan R, Binkley JS, Seeger R, Pople JA. Self-consistent molecular orbital methods. XX. A basis set for correlated wave functions. *J Chem Phys*. 1980;.
4. Tan NY, Ruggiero MT, Orellana-Tavra C, Tian T, Bond AD, Korter TM, Fairen-Jimenez D, Zeitler JA. Investigation of the terahertz vibrational modes of ZIF-8 and ZIF-90 with terahertz time-domain spectroscopy. *Chem Commun*. 2015;51(89):16037–40.
5. Tran UPN, Le KKA, Phan NTS. Expanding Applications of Metal–Organic Frameworks: Zeolite Imidazolate Framework ZIF-8 as an Efficient Heterogeneous Catalyst for the Knoevenagel Reaction. *ACS Catal*. 2011 Jan 18;1(2):120–7.
6. Noël Y, Zicovich-Wilson CM, Civalleri B, D’Arco P, Dovesi R. Polarization properties of ZnO and BeO: An ab initio study through the Berry phase and Wannier functions approaches. *Phys Rev B* 2001;65(1).
7. Pascale F, Zicovich-Wilson CM, Gejo FL, Civalleri B, Orlando R, Dovesi R. The calculation of the vibrational frequencies of crystalline compounds and its implementation in the CRYSTAL code. *J Comput Chem* 2004 Mar 11;25(6):888–97
8. Zicovich-Wilson CM, Pascale F, Roetti C, Saunders VR. Calculation of the vibration frequencies of alpha-quartz: the effect of Hamiltonian and basis set. *J Comput Chem*. 2004 Nov 30;25(15):1873–81.
